# Supplementary material for: Sulphur doping: a facile approach to tune the electronic structure and optical properties of graphene quantum dots
Source: Royal Society of Chemistry journal article supplement (doi:10.1039/c4nr00693c), 2014-01-01
Supplement: c4nr00693c1.pdf [file c4nr00693c1.pdf]

*(Supporting Information)*

**Sulphur doping: a facile approach to tune the  
electronic structure and optical properties of  
graphene quantum dots**

**Xueming Li,<sup>a</sup> Shu Ping Lau,<sup>\*b</sup> Libin Tang,<sup>bc</sup> Rongbin Ji,<sup>c</sup>  
and Peizhi Yang<sup>\*a</sup>**

a. Solar Energy Research Institute, Yunnan Normal University, Kunming 650092, P. R. China

b. Department of Applied Physics, The Hong Kong Polytechnic University, Hong  
Kong SAR, P. R. China.

c. Kunming Institute of Physics, Kunming 650223, P. R. China

## 1. Chemicals

Fructose ( $\geq 99\%$ ) was purchased from Sigma-Aldrich. Sulphuric acid (98% *wt.*) was purchased from International Laboratory, USA. These chemicals were used without further purifying.

## 2. Supplementary Figures

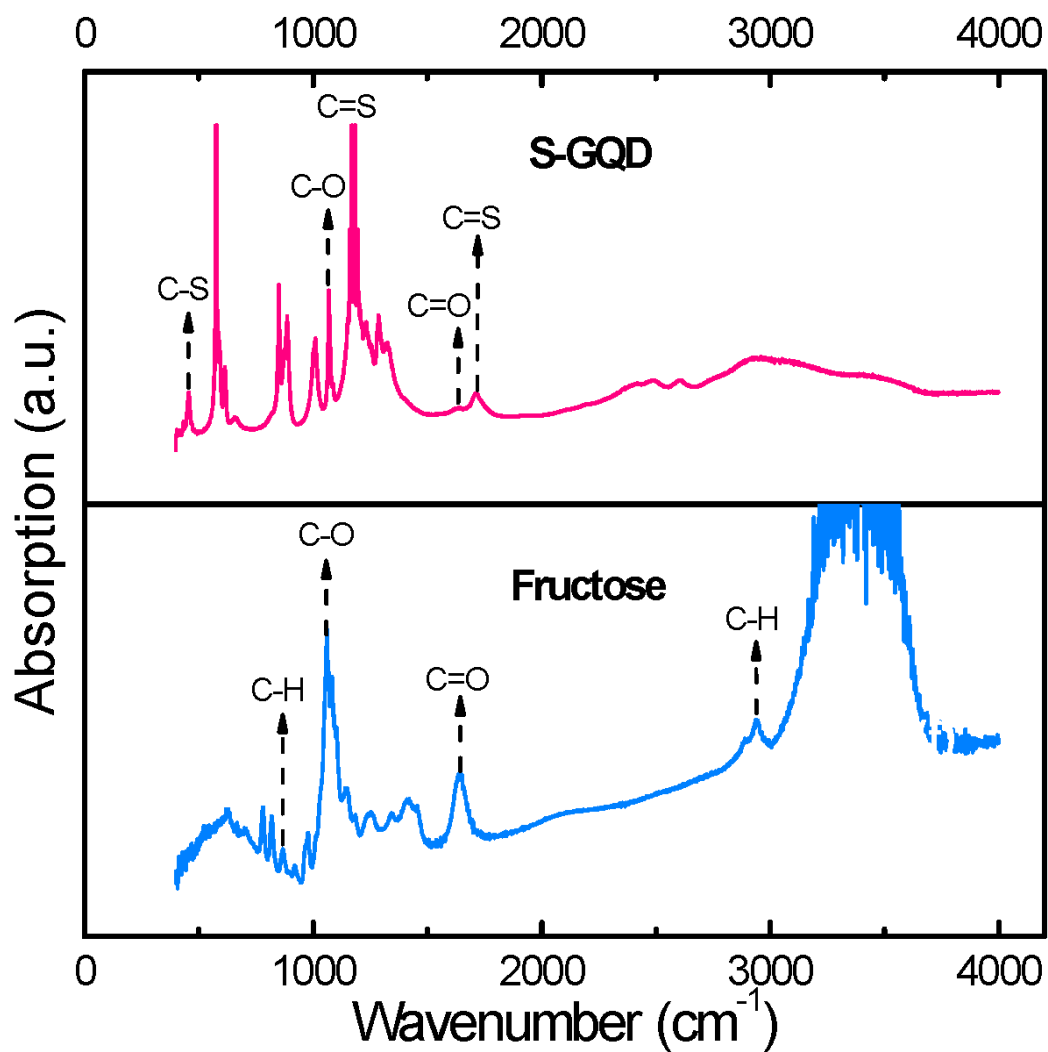

**Figure S1.** The FTIR spectra of the S-GQDs (top) and the source fructose (bottom).

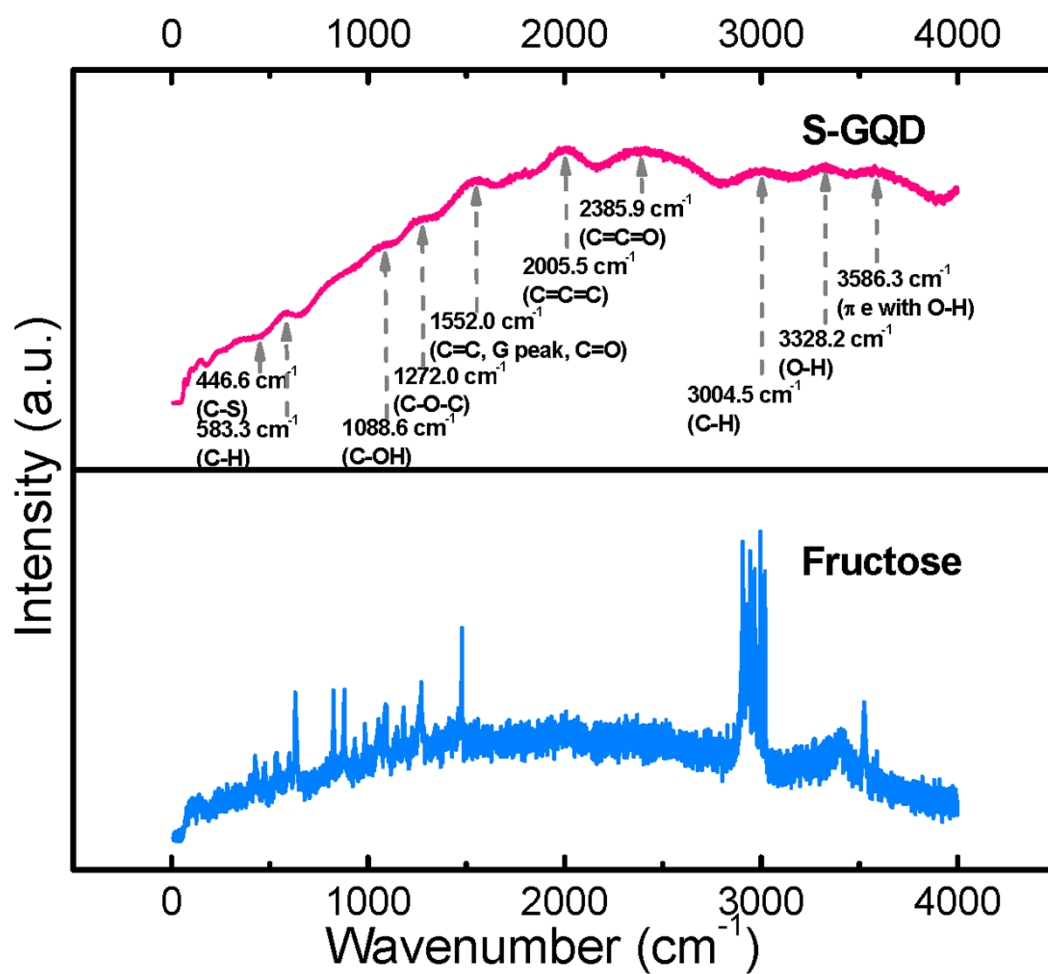

**Figure S2.** The Raman spectra of the S-GQDs (top) and the source fructose (bottom).

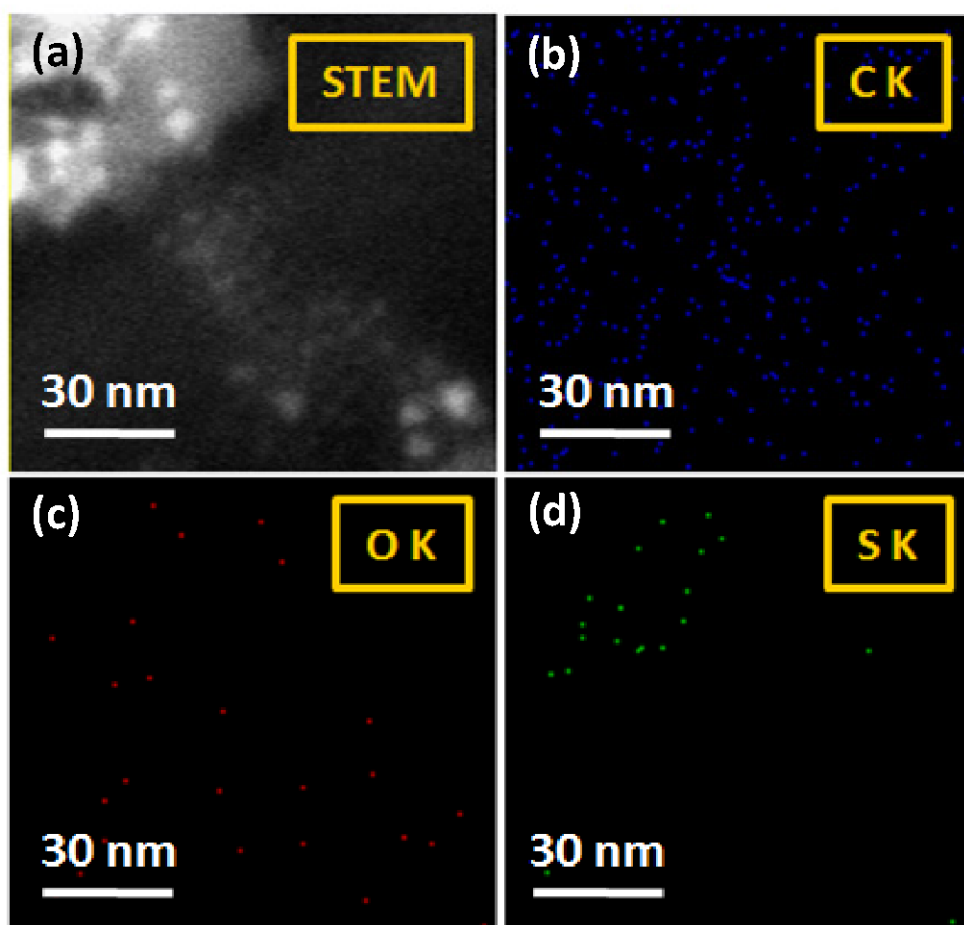

**Figure S3.** (a) STEM image of the S-GQDs assembled on Cu grid coated with ultrathin amorphous carbon film. (b) Elemental C mapping (in blue) of the image shown in panel (a). (c) Elemental O mapping (in red) of the image shown in panel (a). (d) Elemental S mapping (in green) of the image shown in panel (a).

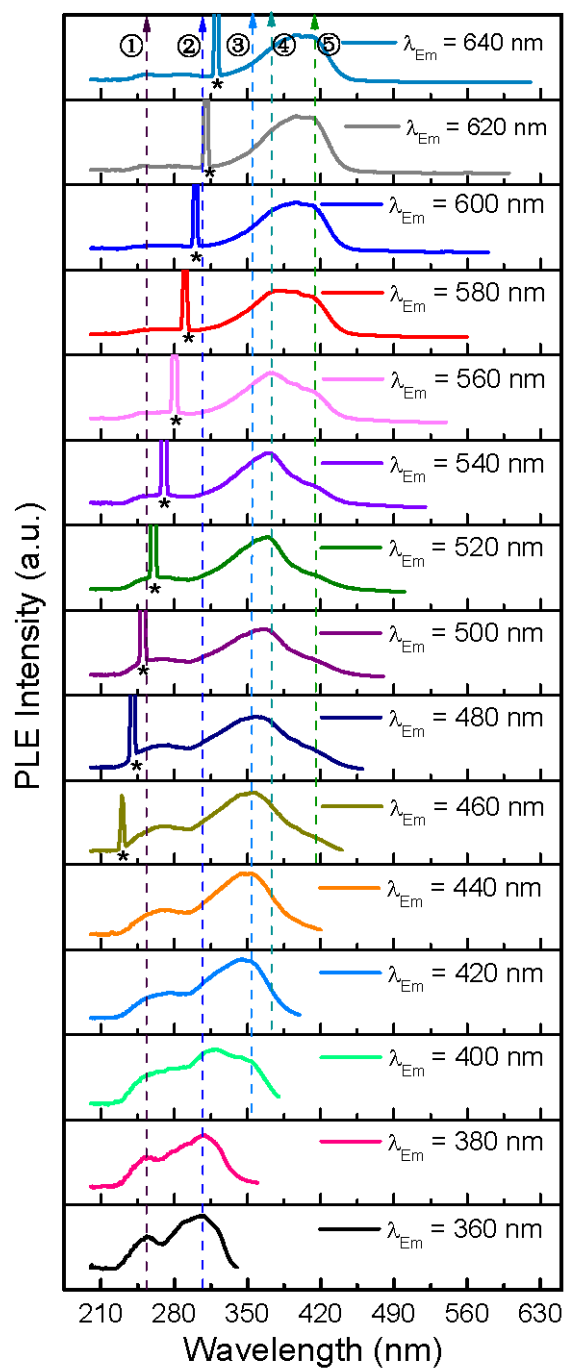

**Figure S4.** The PLE spectra of the S-GQDs recorded at various  $\lambda_{Em}$  (\* is  $\lambda_{Ex}/2$ ).

### 3. Supplementary Table

**Table S1** The fitting parameters of PL decay curves for various  $\lambda_{Em}$

| $\lambda_{Em}$<br>[nm] | $\tau_1$<br>[ns] | $\tau_2$<br>[ns] | $\tau_3$<br>[ns] | $B_1$     | $B_2$    | $B_3$  | $R_1^{(a)}$ | $R_2^{(a)}$ | $R_3^{(a)}$ | $A$     | $\chi^2$ | $\langle \tau \rangle$<br>[ns] <sup>(b)</sup> |
|------------------------|------------------|------------------|------------------|-----------|----------|--------|-------------|-------------|-------------|---------|----------|-----------------------------------------------|
| <b>410</b>             | 0.55             | 3.08             | 29.63            | 58703.02  | 4020.27  | 86.99  | 0.935       | 0.064       | 0.001       | 24.89   | 4.04     | <b>0.75</b>                                   |
| <b>430</b>             | 0.56             | 3.05             | 28.45            | 161000.23 | 11930.68 | 274.80 | 0.930       | 0.069       | 0.002       | 70.91   | 9.70     | <b>0.78</b>                                   |
| <b>450</b>             | 0.61             | 3.09             | 25.21            | 222435.14 | 16917.98 | 436.25 | 0.928       | 0.071       | 0.002       | 109.99  | 12.97    | <b>0.83</b>                                   |
| <b>470</b>             | 0.61             | 2.98             | 18.52            | 288853.63 | 29637.68 | 905.60 | 0.904       | 0.093       | 0.003       | 196.85  | 9.37     | <b>0.88</b>                                   |
| <b>490</b>             | 0.61             | 3.02             | 18.86            | 293968.97 | 28826.99 | 939.26 | 0.908       | 0.089       | 0.003       | 191.54  | 9.55     | <b>0.88</b>                                   |
| <b>510</b>             | 0.58             | 2.83             | 20.31            | 304790.44 | 27628.11 | 875.74 | 0.914       | 0.083       | 0.003       | 202.93  | 7.18     | <b>0.82</b>                                   |
| <b>530</b>             | 0.65             | 3.03             | 33.57            | 415088.69 | 22360.81 | 633.11 | 0.948       | 0.051       | 0.001       | 154.19  | 29.55    | <b>0.82</b>                                   |
| <b>550</b>             | 0.60             | 2.61             | 31.01            | 370878.09 | 25347.35 | 598.31 | 0.935       | 0.064       | 0.002       | 169.80  | 14.86    | <b>0.77</b>                                   |
| <b>570</b>             | 0.65             | 2.83             | 83.95            | 425290.28 | 18188.11 | 608.49 | 0.958       | 0.041       | 0.001       | -58.94  | 49.58    | <b>0.85</b>                                   |
| <b>590</b>             | 0.58             | 2.56             | 103.60           | 384996.16 | 17902.91 | 611.97 | 0.954       | 0.044       | 0.002       | -119.60 | 28.07    | <b>0.82</b>                                   |
| <b>610</b>             | 0.50             | 2.32             | 120.00           | 289038.84 | 16327.67 | 607.85 | 0.945       | 0.053       | 0.002       | -176.77 | 9.44     | <b>0.83</b>                                   |
| <b>630</b>             | 0.48             | 2.24             | 96.37            | 191806.25 | 11425.17 | 397.44 | 0.942       | 0.056       | 0.002       | -62.55  | 5.22     | <b>0.77</b>                                   |
| <b>650</b>             | 0.48             | 2.28             | 120.00           | 111100.05 | 6650.78  | 282.32 | 0.941       | 0.056       | 0.002       | -83.30  | 3.14     | <b>0.87</b>                                   |
| <b>670</b>             | 0.53             | 2.53             | 78.81            | 76635.06  | 3124.25  | 111.64 | 0.959       | 0.039       | 0.001       | -0.88   | 4.90     | <b>0.72</b>                                   |
| <b>690</b>             | 0.50             | 2.41             | 37.16            | 34843.90  | 1874.17  | 52.60  | 0.948       | 0.051       | 0.001       | 16.98   | 1.96     | <b>0.65</b>                                   |
| <b>710</b>             | 0.56             | 2.77             | 90.56            | 22224.54  | 812.62   | 39.04  | 0.963       | 0.035       | 0.002       | -5.97   | 2.72     | <b>0.79</b>                                   |

(a) The photoluminescence decay curves were fitted to a triple-exponential function:

$$I(t) = A + B_1 \cdot e^{(-t/\tau_1)} + B_2 \cdot e^{(-t/\tau_2)} + B_3 \cdot e^{(-t/\tau_3)},$$

$R_i$  is the relative ratio factor which is

calculated by  $R_i = B_i / (\sum_{i=1}^3 B_i)$ .

(b)  $\tau_{\text{average}}$  is the average lifetime,  $\tau_{\text{average}}$  is calculated according to  $\tau_{\text{average}} = \sum_{i=1}^3 R_i \cdot \tau_i$ .
